# Supplementary material for: Xenon Plasma Focused Ion Beam Milling for Obtaining Soft X-ray Transparent Samples
Source: MDPI journal article supplement (doi:10.3390/cryst11050546), 2021-05-14
Supplement: s1 [file s1]

# Xenon Plasma Focused Ion Beam Milling for Obtaining Soft X-ray Transparent Samples

Sina Mayr <sup>1,2,\*</sup>, Simone Finizio <sup>1</sup>, Joakim Reuteler <sup>3</sup>, Stefan Stutz <sup>1</sup>, Carsten Dubs <sup>4</sup>, Markus Weigand <sup>5</sup>, Aleš Hrabec <sup>1,2,6</sup>, Jörg Raabe <sup>1</sup> and Sebastian Wintz <sup>1,7,\*</sup>

<sup>1</sup> Paul Scherrer Institut, 5232 Villigen PSI, Switzerland

<sup>2</sup> Laboratory for Mesoscopic Systems, Department of Materials, ETH Zurich, 8093 Zurich, Switzerland

<sup>3</sup> Scientific Center for Optical and Electron Microscopy, ETH Zurich, 8093 Zurich, Switzerland

<sup>4</sup> INNOVENT e.V. Technologieentwicklung Jena, 07745 Jena, Germany

<sup>5</sup> Helmholtz-Zentrum Berlin, 14109 Berlin, Germany

<sup>6</sup> Laboratory for Magnetism and Interface Physics, Department of Materials, ETH Zurich, 8093 Zurich, Switzerland

<sup>7</sup> Max Planck Institute for Intelligent Systems, 70569 Stuttgart, Germany

\* Correspondence: sina.mayr@psi.ch, wintz@is.mpg.de

## 1. PFIB Sample Holder

To determine the thickness of the milled windows it is crucial that the samples are mounted such that the electrons can freely pass through them. Therefore, the samples have to be mounted in a way that there is no material behind them. As the samples are approximately only 100  $\mu\text{m}$  thick at this fabrication step, mounting them can be a challenging task with an increasing difficulty towards smaller samples. For this purpose, we designed a PFIB sample holder, where the samples are mounted across a dedicated cavity, fixed with two clamps to allow tilting as it is required for PFIB processing (see Fig. S1a). The holder is designed to allow mounting of samples with sizes down to 2.5 mm  $\times$  2.5 mm and it is compatible with the standard carrier system of our PFIB tool as shown in Figure S1.

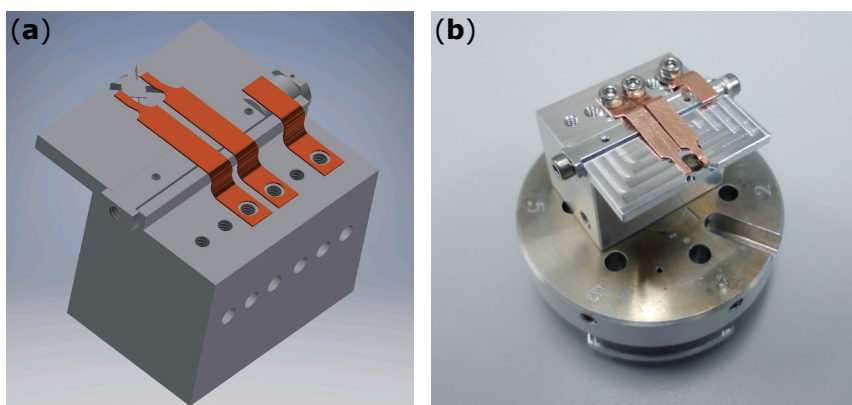

**Figure S1.** PFIB sample holder. (a) Design of the holder with the clamps for sample fixation in red. (b) Photo of the sample holder mounted on the PFIB carrier.
